# Supplementary material for: Changes in Dietary Intake Patterns and Weight Status during the COVID-19 Lockdown: A Cross-Sectional Study Focusing on Young Adults in Malaysia
Source: MDPI journal article supplement (doi:10.3390/nu14020280), 2022-01-10
Supplement: s1 [file s1]

**Table S1.** The Modified Dietary Diversity Questionnaire.

Instruction: This section aims to assess the food consumption patterns before and during the COVID-19 lockdown. Please select **ONE** option which best represented your food intakes.

Question: During the COVID-19 lockdown, my consumption for **(substitute with item from column A)** *reduced/remained the same/increased* compared to pre-pandemic.

For example: During the COVID-19 lockdown, my consumption for **cereals and grains** *reduced/remained the same/increased* compared to pre-pandemic.

| Item (column A)             | Examples                                                                                    | Food consumption pattern <sup>1</sup> |                   |           |
|-----------------------------|---------------------------------------------------------------------------------------------|---------------------------------------|-------------------|-----------|
|                             |                                                                                             | Reduced                               | Remained the same | Increased |
| Cereals and grains          | Rice, corn, wheat, bread, noodles, pasta, porridge, oats, grains, etc.                      |                                       |                   |           |
| Vitamin A-rich tubers       | Carrots, sweet potatoes, etc.                                                               |                                       |                   |           |
| White tubers and roots      | White potatoes, white yam, white cassava, etc.                                              |                                       |                   |           |
| Dark green leafy vegetables | <i>Bayam</i> (spinach), <i>sawi</i> (Mustard greens), <i>kangkong</i> (Water Spinach), etc. |                                       |                   |           |
| Other vegetables            | Tomato, onion, eggplant, etc.                                                               |                                       |                   |           |
| Fruits                      | Apple, oranges, mangoes, apricots, papaya, peaches, guava, durian, <i>rambutan</i> , etc.   |                                       |                   |           |
| Flesh meats                 | Beef, pork, lamb, chicken, duck, etc.                                                       |                                       |                   |           |
| Eggs                        | Chicken egg, duck egg, preserved egg, etc.                                                  |                                       |                   |           |
| Fish and shellfish          | Fresh/dried/canned fish, shellfish, etc.                                                    |                                       |                   |           |
| Legumes, nuts and seeds     | Beans, peas, lentils, nuts, seeds, or foods made from these.                                |                                       |                   |           |
| Milk and dairy products     | Milk, cheese, yogurt, etc.                                                                  |                                       |                   |           |
| Oils and fats               | Oils, fats or butter added to food or used for cooking.                                     |                                       |                   |           |
| Sugars and sweets           | Sugar, honey, carbonated drinks, chocolates, candies, cookies and cakes.                    |                                       |                   |           |
| Salts                       | Processed foods, salty snacks or salts added to food or used for cooking.                   |                                       |                   |           |

|             |                                                                                              |  |  |  |
|-------------|----------------------------------------------------------------------------------------------|--|--|--|
| Plain water | Boiled water, bottled water (drinking water/mineral water/unsweetened sparkling water), etc. |  |  |  |
|-------------|----------------------------------------------------------------------------------------------|--|--|--|

<sup>1</sup> Respondents were only allowed to select one option in Google forms.
